# Supplementary material
Source: publisher site journal article supplement (https://www.dovepress.com/article/336269)
Supplement: Supplementary file 1 [file get_supplementary_file.php]

Supplementary table 1 Summary of clinical dosimetric and physical parameters of IMRT planning in esophageal cancers

| Parameters           | MSW (Mean $\pm$ SD)  |                      |                      |                      |
|----------------------|----------------------|----------------------|----------------------|----------------------|
|                      | 0.5 cm               | 1 cm                 | 1.5 cm               | 2 cm                 |
| Heart.V30 (%)        | 6.174 $\pm$ 8.407    | 5.931 $\pm$ 7.960    | 6.236 $\pm$ 8.365    | 6.808 $\pm$ 9.003    |
| Heart.V40 (%)        | 2.852 $\pm$ 3.824    | 2.745 $\pm$ 3.600    | 2.920 $\pm$ 3.865    | 3.523 $\pm$ 4.667    |
| H.Dmean (Gy)         | 6.130 $\pm$ 6.524    | 6.097 $\pm$ 6.439    | 6.177 $\pm$ 6.51     | 6.084 $\pm$ 6.61     |
| Llung.V20 (%)        | 19.388 $\pm$ 3.351   | 19.105 $\pm$ 3.440   | 19.500 $\pm$ 3.327   | 20.599 $\pm$ 3.365   |
| Llung.V30 (%)        | 8.838 $\pm$ 3.270    | 8.630 $\pm$ 3.256    | 8.652 $\pm$ 3.269    | 9.267 $\pm$ 3.608    |
| Llung.Dmean (Gy)     | 10.833 $\pm$ 1.403   | 10.759 $\pm$ 1.503   | 10.842 $\pm$ 1.51    | 10.934 $\pm$ 1.678   |
| Rlung.V20 (%)        | 20.195 $\pm$ 3.064   | 20.534 $\pm$ 2.873   | 20.584 $\pm$ 3.048   | 20.253 $\pm$ 3.055   |
| Rlung.V30 (%)        | 9.347 $\pm$ 2.719    | 9.467 $\pm$ 2.914    | 9.884 $\pm$ 2.776    | 9.919 $\pm$ 2.936    |
| Rlung.Dmean (Gy)     | 10.502 $\pm$ 1.556   | 10.59 $\pm$ 1.606    | 10.642 $\pm$ 1.654   | 10.479 $\pm$ 1.660   |
| Spine.Dmax (Gy)      | 41.905 $\pm$ 1.795   | 42.123 $\pm$ 1.671   | 42.444 $\pm$ 1.503   | 43.615 $\pm$ 1.509   |
| PTV51.D95 (Gy)       | 51.776 $\pm$ 0.470   | 51.84 $\pm$ 0.607    | 51.714 $\pm$ 0.713   | 51.44 $\pm$ 1.158    |
| PTV51.CI             | 0.854 $\pm$ 0.049    | 0.848 $\pm$ 0.047    | 0.839 $\pm$ 0.047    | 0.790 $\pm$ 0.048    |
| PTV51.HI             | 1.212 $\pm$ 0.022    | 1.213 $\pm$ 0.023    | 1.224 $\pm$ 0.025    | 1.256 $\pm$ 0.045    |
| PTV60.CI             | 0.748 $\pm$ 0.079    | 0.728 $\pm$ 0.097    | 0.705 $\pm$ 0.106    | 0.604 $\pm$ 0.126    |
| PTV60.HI             | 1.060 $\pm$ 0.012    | 1.064 $\pm$ 0.016    | 1.071 $\pm$ 0.016    | 1.094 $\pm$ 0.026    |
| Monitor units        | 668.896 $\pm$ 57.900 | 573.022 $\pm$ 59.361 | 540.501 $\pm$ 57.386 | 574.883 $\pm$ 92.867 |
| Control points       | 144.250 $\pm$ 1.164  | 137.350 $\pm$ 5.696  | 130.100 $\pm$ 9.442  | 116.700 $\pm$ 9.669  |
| Delivery times (sec) | 208.754 $\pm$ 21.616 | 182.504 $\pm$ 13.074 | 180.019 $\pm$ 14.807 | 189.638 $\pm$ 24.712 |
| GPR.2.2AD (%)        | 95.040 $\pm$ 2.397   | 95.625 $\pm$ 2.454   | 95.465 $\pm$ 2.052   | 94.680 $\pm$ 2.336   |
| GPR.2.2RD (%)        | 95.520 $\pm$ 1.696   | 96.140 $\pm$ 2.110   | 96.185 $\pm$ 1.477   | 96.490 $\pm$ 1.363   |
| GPR.3.3AD (%)        | 98.510 $\pm$ 1.039   | 98.875 $\pm$ 0.962   | 98.740 $\pm$ 0.859   | 98.825 $\pm$ 0.685   |
| GPR.3.3RD (%)        | 98.780 $\pm$ 0.916   | 99.140 $\pm$ 0.849   | 99.180 $\pm$ 0.608   | 99.395 $\pm$ 0.341   |

Note:

Heart.V30 (%) : The percent volume receiving a dose of 30Gy of Heart

Heart.V40 (%) : The percent volume receiving a dose of 40Gy of Heart

H.Dmean (Gy) : The mean radiation dose of Heart

Llung.V20 (%) : The percent volume receiving a dose of 20Gy of left lung

Llung.V30 (%) : The percent volume receiving a dose of 30Gy of left lung

Llung.Dmean (Gy) : The mean radiation dose of left lung

Rlung.V20 (%) : The percent volume receiving a dose of 20Gy of right lung

Rlung.V30 (%) : The percent volume receiving a dose of 20Gy of right lung

Rlung.Dmean (Gy) : The mean radiation dose of right lung

Spine.Dmax (Gy) : The maximal radiation dose of Spine

PTV51.D95 (Gy) : The radiation dose covering 95% volume of PTV51

PTV51.CI : The Conformity index of PTV51

PTV51.HI : The Homogeneity index of PTV51

PTV60.CI : The Conformity index of PTV60

PTV60.HI : The Homogeneity index of PTV60

GPR.2.2AD (%) : Absolute Dose of GPR with a standard of 2% dose difference and a 2 mm distance to agreement

GPR.2.2RD (%) : Relative Dose of GPR with a standard of 2% dose difference and a 2 mm distance to agreement

GPR.3.3AD (%) : Absolute Dose of GPR with a standard of 3% dose difference and a 3 mm distance to agreement

GPR.3.3RD (%) : Relative Dose of GPR with a standard of 3% dose difference and a 3 mm distance to agreement

Supplementary table 2 Summary of clinical dosimetric and physical parameters in esophageal cancers

| Parameter        | MSW Groups | Mean $\pm$ SD     | Relative value (95%Ci)                 |
|------------------|------------|-------------------|----------------------------------------|
|                  | 0.5(ref)   | 1                 | 1                                      |
| Heart.V30 (%)    | 1.0        | 1.011 $\pm$ 0.089 | 1.011 ( 0.913 - 1.110 )                |
|                  | 1.5        | 1.028 $\pm$ 0.071 | 1.028 ( 0.929 - 1.126 )                |
|                  | 2.0        | 1.005 $\pm$ 0.299 | 1.005 ( 0.906 - 1.103 )                |
|                  | 0.5(ref)   | 1                 | 1                                      |
| Heart.V40 (%)    | 1.0        | 1.012 $\pm$ 0.091 | 1.012 ( 0.859 - 1.165 )                |
|                  | 1.5        | 1.061 $\pm$ 0.196 | 1.061 ( 0.909 - 1.214 )                |
|                  | 2.0        | 1.022 $\pm$ 0.445 | 1.022 ( 0.870 - 1.175 )                |
|                  | 0.5(ref)   | 1                 | 1                                      |
| H.Dmean (Gy)     | 1.0        | 0.988 $\pm$ 0.048 | 0.988 ( 0.945 - 1.030 )                |
|                  | 1.5        | 1.006 $\pm$ 0.079 | 1.006 ( 0.963 - 1.049 )                |
|                  | 2.0        | 0.961 $\pm$ 0.108 | 0.961 ( 0.919 - 1.004 )                |
|                  | 0.5(ref)   | 1                 | 1                                      |
| Llung.V20 (%)    | 1.0        | 0.986 $\pm$ 0.065 | 0.986 ( 0.944 - 1.028 )                |
|                  | 1.5        | 1.011 $\pm$ 0.089 | 1.011 ( 0.969 - 1.052 )                |
|                  | 2.0        | 1.072 $\pm$ 0.121 | 1.072 ( 1.030 - 1.114 ) <sup>ab</sup>  |
|                  | 0.5(ref)   | 1                 | 1                                      |
| Llung.V30 (%)    | 1.0        | 0.975 $\pm$ 0.085 | 0.975 ( 0.934 - 1.016 )                |
|                  | 1.5        | 0.973 $\pm$ 0.072 | 0.973 ( 0.932 - 1.014 )                |
|                  | 2.0        | 1.050 $\pm$ 0.107 | 1.050 ( 1.009 - 1.091 ) <sup>a</sup>   |
|                  | 0.5(ref)   | 1                 | 1                                      |
| Llung.Dmean (Gy) | 1.0        | 0.992 $\pm$ 0.030 | 0.992 ( 0.976 - 1.009 )                |
|                  | 1.5        | 1.000 $\pm$ 0.032 | 1.000 ( 0.984 - 1.016 )                |
|                  | 2.0        | 1.007 $\pm$ 0.048 | 1.007 ( 0.991 - 1.023 )                |
|                  | 0.5(ref)   | 1                 | 1                                      |
| Rlung.V20 (%)    | 1.0        | 1.020 $\pm$ 0.051 | 1.020 ( 0.992 - 1.047 )                |
|                  | 1.5        | 1.021 $\pm$ 0.068 | 1.021 ( 0.994 - 1.048 )                |
|                  | 2.0        | 1.005 $\pm$ 0.086 | 1.005 ( 0.978 - 1.032 )                |
|                  | 0.5(ref)   | 1                 | 1                                      |
| Rlung.V30 (%)    | 1.0        | 1.008 $\pm$ 0.038 | 1.008 ( 0.964 - 1.051 )                |
|                  | 1.5        | 1.063 $\pm$ 0.087 | 1.063 ( 1.020 - 1.106 ) <sup>a</sup>   |
|                  | 2.0        | 1.065 $\pm$ 0.121 | 1.065 ( 1.022 - 1.109 ) <sup>a</sup>   |
|                  | 0.5(ref)   | 1                 | 1                                      |
| Rlung.Dmean (Gy) | 1.0        | 1.008 $\pm$ 0.017 | 1.008 ( 0.994 - 1.022 )                |
|                  | 1.5        | 1.012 $\pm$ 0.024 | 1.012 ( 0.998 - 1.026 )                |
|                  | 2.0        | 0.997 $\pm$ 0.044 | 0.997 ( 0.983 - 1.011 )                |
|                  | 0.5(ref)   | 1                 | 1                                      |
| Spine.Dmax (Gy)  | 1.0        | 1.005 $\pm$ 0.014 | 1.005 ( 0.998 - 1.012 )                |
|                  | 1.5        | 1.013 $\pm$ 0.014 | 1.013 ( 1.006 - 1.020 ) <sup>a</sup>   |
|                  | 2.0        | 1.041 $\pm$ 0.022 | 1.041 ( 1.034 - 1.048 ) <sup>abc</sup> |
|                  | 0.5(ref)   | 1                 | 1                                      |
| PTV51.D95 (Gy)   | 1.0        | 1.001 $\pm$ 0.005 | 1.001 ( 0.996 - 1.006 )                |

|                      |          |               |                                        |
|----------------------|----------|---------------|----------------------------------------|
|                      | 1.5      | 0.999 ± 0.007 | 0.999 ( 0.994 - 1.004 )                |
|                      | 2.0      | 0.993 ± 0.015 | 0.993 ( 0.989 - 0.998 ) <sup>a</sup>   |
|                      | 0.5(ref) | 1             | 1                                      |
| PTV51.CI             | 1.0      | 0.993 ± 0.016 | 0.993 ( 0.980 - 1.006 )                |
|                      | 1.5      | 0.983 ± 0.014 | 0.983 ( 0.970 - 0.996 ) <sup>a</sup>   |
|                      | 2.0      | 0.927 ± 0.042 | 0.927 ( 0.914 - 0.940 ) <sup>abc</sup> |
|                      | 0.5(ref) | 1             | 1                                      |
| PTV51.HI             | 1.0      | 1.001 ± 0.013 | 1.001 ( 0.992 - 1.009 )                |
|                      | 1.5      | 1.010 ± 0.014 | 1.010 ( 1.001 - 1.019 ) <sup>a</sup>   |
|                      | 2.0      | 1.036 ± 0.029 | 1.036 ( 1.027 - 1.044 ) <sup>abc</sup> |
|                      | 0.5(ref) | 1             | 1                                      |
| PTV60.CI             | 1.0      | 0.970 ± 0.055 | 0.970 ( 0.931 - 1.010 )                |
|                      | 1.5      | 0.939 ± 0.066 | 0.939 ( 0.900 - 0.979 ) <sup>a</sup>   |
|                      | 2.0      | 0.805 ± 0.128 | 0.805 ( 0.766 - 0.845 ) <sup>abc</sup> |
|                      | 0.5(ref) | 1             | 1                                      |
| PTV60.HI             | 1.0      | 1.004 ± 0.007 | 1.004 ( 0.997 - 1.010 )                |
|                      | 1.5      | 1.011 ± 0.010 | 1.011 ( 1.004 - 1.017 ) <sup>a</sup>   |
|                      | 2.0      | 1.033 ± 0.020 | 1.033 ( 1.026 - 1.040 ) <sup>abc</sup> |
|                      | 0.5(ref) | 1             | 1                                      |
| Monitor units        | 1.0      | 0.858 ± 0.069 | 0.858 ( 0.815 - 0.900 ) <sup>a</sup>   |
|                      | 1.5      | 0.812 ± 0.095 | 0.812 ( 0.769 - 0.854 ) <sup>a</sup>   |
|                      | 2.0      | 0.861 ± 0.137 | 0.861 ( 0.819 - 0.904 ) <sup>a</sup>   |
|                      | 0.5(ref) | 1             | 1                                      |
| Control points       | 1.0      | 0.952 ± 0.038 | 0.952 ( 0.927 - 0.977 ) <sup>a</sup>   |
|                      | 1.5      | 0.902 ± 0.063 | 0.902 ( 0.877 - 0.927 ) <sup>a</sup>   |
|                      | 2.0      | 0.809 ± 0.066 | 0.809 ( 0.784 - 0.834 ) <sup>abc</sup> |
|                      | 0.5(ref) | 1             | 1                                      |
| Delivery times (sec) | 1.0      | 0.879 ± 0.064 | 0.879 ( 0.840 - 0.918 ) <sup>a</sup>   |
|                      | 1.5      | 0.870 ± 0.105 | 0.870 ( 0.831 - 0.909 ) <sup>a</sup>   |
|                      | 2.0      | 0.913 ± 0.119 | 0.913 ( 0.874 - 0.952 ) <sup>a</sup>   |
|                      | 0.5(ref) | 1             | 1                                      |
| GPR.2.2AD (%)        | 1.0      | 1.006 ± 0.018 | 1.006 ( 0.999 - 1.014 )                |
|                      | 1.5      | 1.005 ± 0.013 | 1.005 ( 0.997 - 1.012 )                |
|                      | 2.0      | 0.996 ± 0.014 | 0.996 ( 0.989 - 1.004 )                |
|                      | 0.5(ref) | 1             | 1                                      |
| GPR.2.2RD (%)        | 1.0      | 1.007 ± 0.016 | 1.007 ( 1.000 - 1.013 )                |
|                      | 1.5      | 1.007 ± 0.011 | 1.007 ( 1.000 - 1.014 ) <sup>a</sup>   |
|                      | 2.0      | 1.01 ± 0.012  | 1.010 ( 1.004 - 1.017 ) <sup>a</sup>   |
|                      | 0.5(ref) | 1             | 1                                      |
| GPR.3.3AD (%)        | 1.0      | 1.004 ± 0.009 | 1.004 ( 1.001 - 1.007 ) <sup>a</sup>   |
|                      | 1.5      | 1.002 ± 0.006 | 1.002 ( 0.999 - 1.006 )                |
|                      | 2.0      | 1.003 ± 0.009 | 1.003 ( 1.000 - 1.007 )                |
|                      | 0.5(ref) | 1             | 1                                      |
| GPR.3.3RD (%)        | 1.0      | 1.004 ± 0.008 | 1.004 ( 1.001 - 1.007 ) <sup>a</sup>   |
|                      | 1.5      | 1.004 ± 0.005 | 1.004 ( 1.001 - 1.007 ) <sup>a</sup>   |
|                      | 2.0      | 1.006 ± 0.008 | 1.006 ( 1.003 - 1.009 ) <sup>a</sup>   |

- a  $P < 0.05$ , vs. 0.5 cm MSW Generalized Linear Mixed Regression Analysis
- b  $P < 0.05$ , vs. 1.0 cm MSW Generalized Linear Mixed Regression Analysis
- c  $P < 0.05$ , vs. 1.5 cm MSW Generalized Linear Mixed Regression Analysis

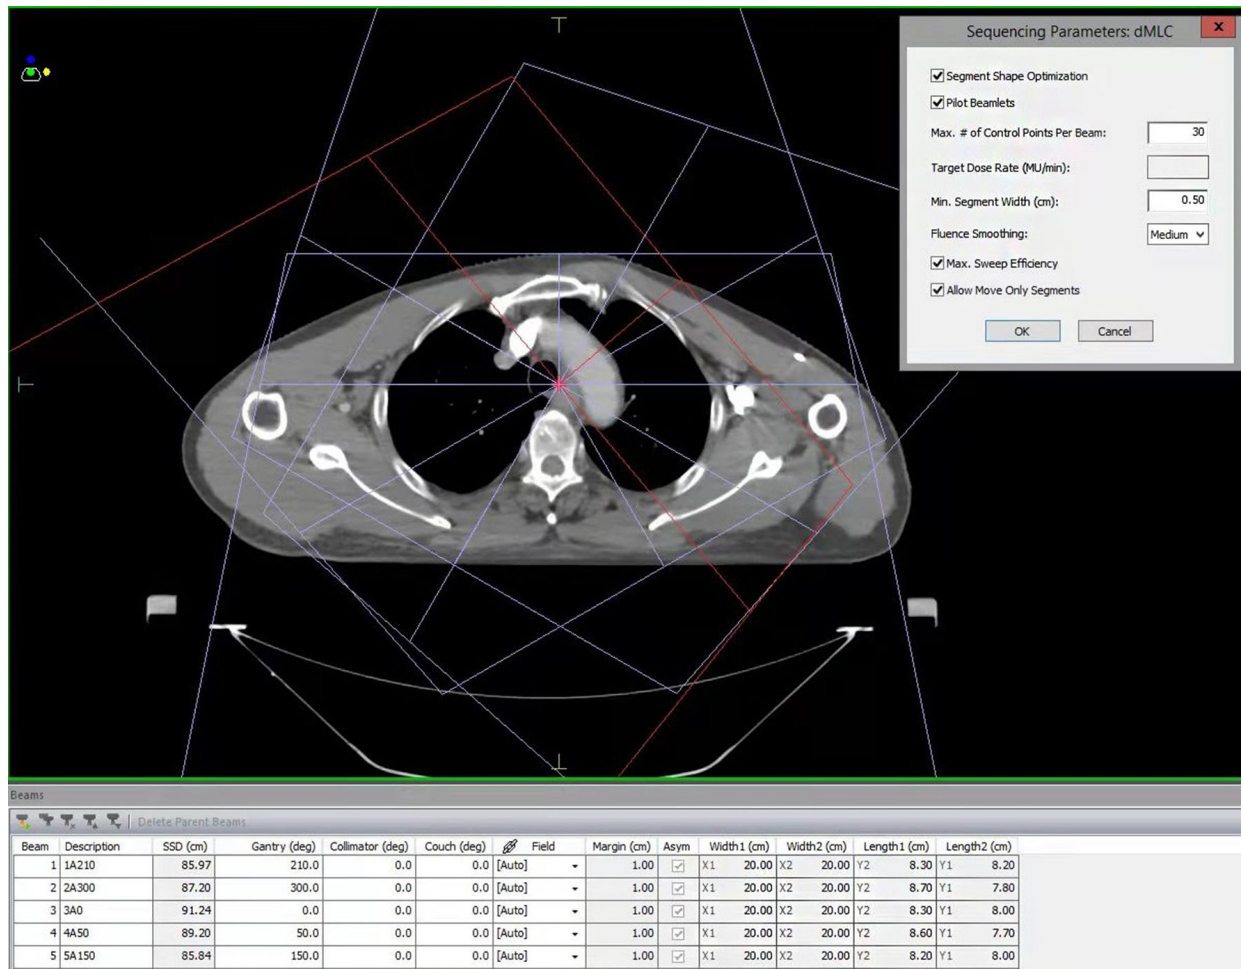

Supplementary Figure 1. The beam's eye view of an example treatment plan.
